# Supplementary material for: KNOTTED1-LIKE HOMEOBOX 3: a new regulator of symbiotic nodule development
Source: PubMed Central journal article supplement (PMC4765789; doi:10.1093/jxb/erv414), 2015-09-07
Supplement: supp_erv414_supplementary_corrected_final.pdf [file supp_erv414_supplementary_corrected_final.pdf]

Figure S2

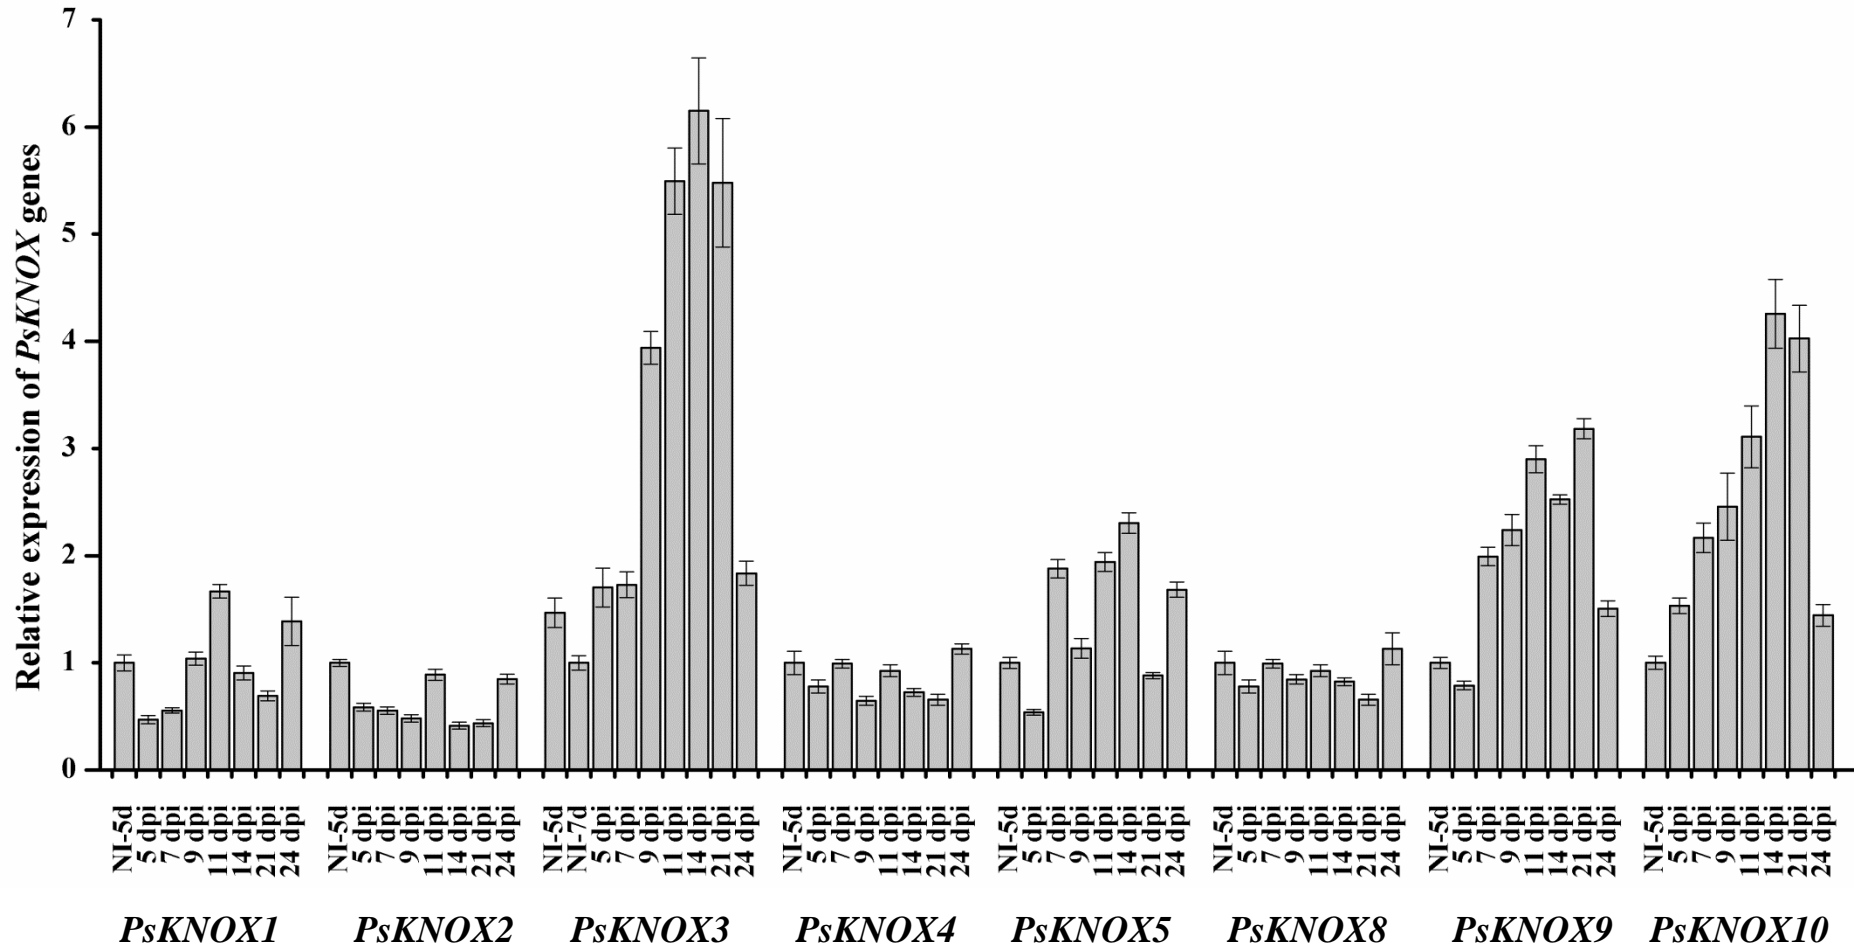

Figure S3

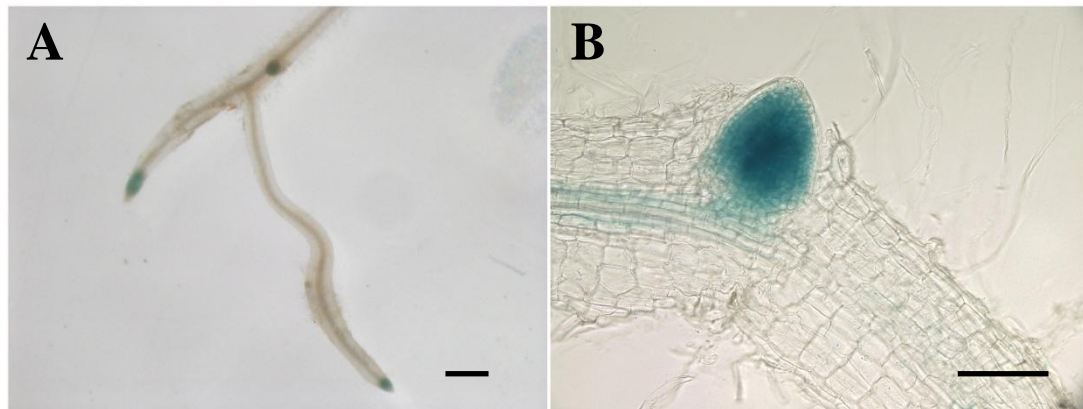

Figure S4

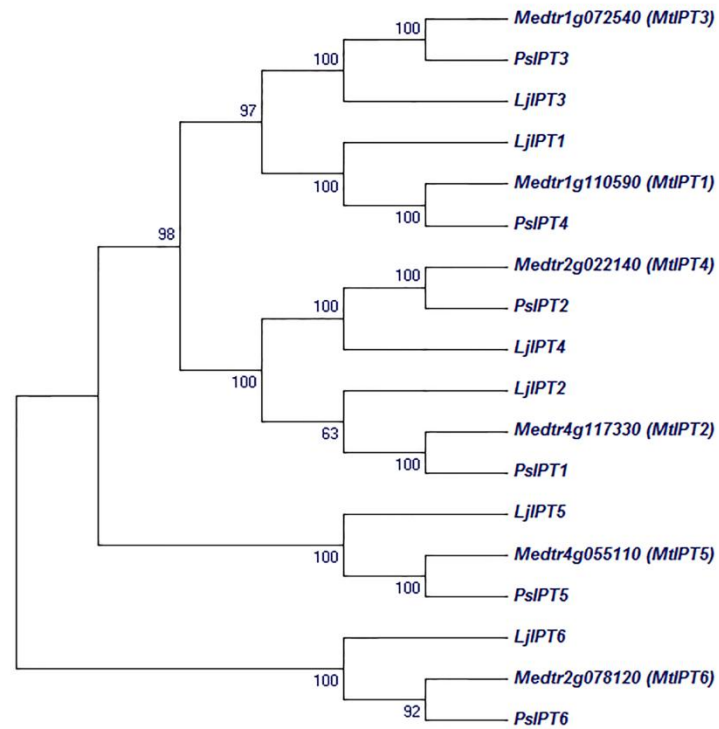

| <i>Medicago truncatula</i>       | <i>Lotus japonicus</i> | Similarity (%) |
|----------------------------------|------------------------|----------------|
| Medtr1g110590 ( <i>MtiIPT1</i> ) | <i>LjIPT1</i>          | 67%            |
| Medtr4g117330 ( <i>MtiIPT2</i> ) | <i>LjIPT2</i>          | 64,3%          |
| Medtr1g072540 ( <i>MtiIPT3</i> ) | <i>LjIPT3</i>          | 71,8%          |
| Medtr2g022140 ( <i>MtiIPT4</i> ) | <i>LjIPT4</i>          | 70%            |
| Medtr4g055110 ( <i>MtiIPT5</i> ) | <i>LjIPT5</i>          | 80,4%          |
| Medtr2g078120 ( <i>MtiIPT6</i> ) | <i>LjIPT6</i>          | 85,3%          |

| <i>Medicago truncatula</i>       | <i>Pisum sativum</i> L.        | Similarity (%) |
|----------------------------------|--------------------------------|----------------|
| Medtr1g110590 ( <i>MtiIPT1</i> ) | <i>PsIPT4</i>                  | 79,6%          |
| Medtr4g117330 ( <i>MtiIPT2</i> ) | <i>PsIPT1</i>                  | 82,2%          |
| Medtr1g072540 ( <i>MtiIPT3</i> ) | <i>PsIPT3</i>                  | 84,4%          |
| Medtr2g022140 ( <i>MtiIPT4</i> ) | <i>PsIPT2</i>                  | 85,5%          |
| Medtr4g055110 ( <i>MtiIPT5</i> ) | <i>PsIPT5</i>                  | 84,7%          |
| Medtr2g078120 ( <i>MtiIPT6</i> ) | <i>PsIPT6</i><br>(CDS partial) | 90,9%          |

Figure S5

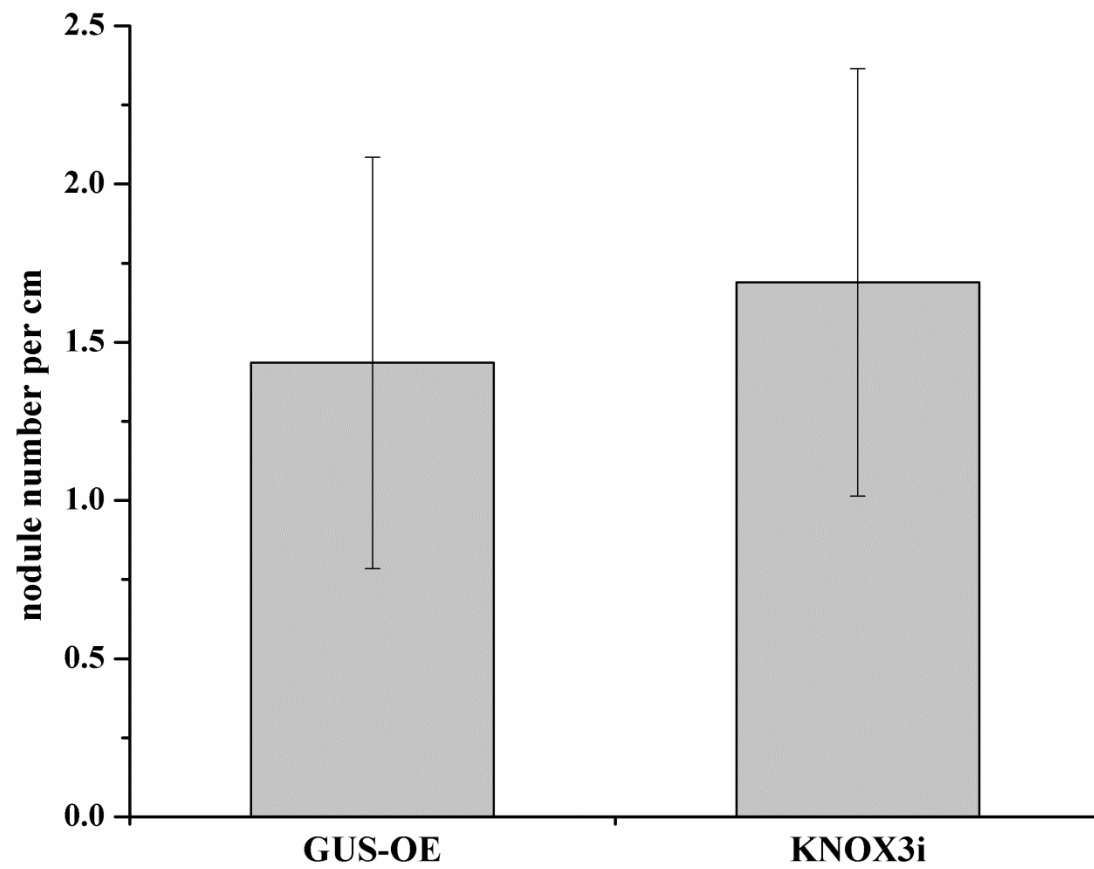

**Table S1.**

List of primers used for cloning.

| <b>gene</b>                             | <b>Forward primer</b>                        | <b>Reverse primer</b>                       |
|-----------------------------------------|----------------------------------------------|---------------------------------------------|
| <i>MtKNOX3-OE</i>                       | 5'-AAAAAAGCAGGCTTCATGGCTTACCAAAACCAACATCT-3' | 5'-CAAGAAAGCTGGGTCTAGTTTTGAGACCTTTTGCCTT-3' |
| <i>MtKNOX3i</i>                         | 5'-CACCATGGCTTACCAAAACCAACATC-3'             | 5'-TTGGTTATTAGGGTCGGAATCA-3'                |
| <i>PsKNOX3-OE</i>                       | 5'-GGAGATAGAACCATGGCTTATCACAACCAGCATC-3'     | 5'-AAGCTGGGTGCTAGTTTTGAGACCTTTTGCCT-3'      |
| attB_primers                            | 5'-GGGGACAAGTTTGTACAAAAAGCAGGCTTC-3'         | 5'-GGGGACCACTTTGTACAAGAAAGCTGGGTG-3'        |
| <i>PsKNOX3_check</i>                    | 5'-CTCCTTTGTTCAAACACATAA-3'                  | 5'-TTAGTGCAATTATCATCCCT-3'                  |
| <i>PsKNOX3_3'_F1_RACE</i> (cv. Frisson) | 5'-CAAAGCTTAACAGGAGTTTCACC-3'                |                                             |
| <i>PsKNOX3_3'_F2_RACE</i> (cv. Frisson) | 5'-GATTTGGCCCTCTTATACCTACAG-3'               |                                             |
| <i>PsKNOX3_3'_F3_RACE</i> (cv. Frisson) | 5'-AAGAGACGAGCCGGGAAACT-3'                   |                                             |
| <i>PsKNOX3_5'_R1_RACE</i> (cv. Frisson) |                                              | 5'-AGTTTCCCGCTCGTCTCTT-3'                   |
| <i>PsKNOX3_5'_R2_RACE</i> (cv. Frisson) |                                              | 5'-CTGTAGGTATAAGAGGGCCAAATC-3'              |
| <i>PsKNOX3_5'_R3_RACE</i> (cv. Frisson) |                                              | 5'-GGTGAACTCCTGTTAAGCTTTG-3'                |
| <i>PsKNOX4_check</i>                    | 5'-ACCTCAACCCTCTTCCT-3'                      | 5'-AGTACTCTATCATCAATAACCATA-3'              |
| <i>PsKNOX5_check</i>                    | 5'-ACTCTCAACTTCTCCTTCGC-3'                   | 5'-CATATATATGTAATCACCATCAC-3'               |
| <i>PsKNOX6-3'_F1_RACE</i>               | 5'-ATGGCTCATCCTCTCTTTCC-3'                   |                                             |
| <i>PsKNOX6-3'_F2_RACE</i>               | 5'-ATGTGAATTATTGAATGG-3'                     |                                             |
| <i>PsKNOX6-3'_F3_RACE</i>               | 5'-GTTTGGATCAGTTCATGGAG-3'                   |                                             |
| <i>PsKNOX6-5'_R1_RACE</i>               |                                              | 5'-CTCCATGAACTGATCCAAAC-3'                  |
| <i>PsKNOX6-5'_R2_RACE</i>               |                                              | 5'-CCATTCAATAATTCACAT-3'                    |

|                                      |                                |                                 |
|--------------------------------------|--------------------------------|---------------------------------|
| <i>PsKNOX6-5'_R3</i><br><i>RACE</i>  |                                | 5'-GGAAAGAGAGGATGAGCCAT-3'      |
| <i>PsKNOX8_3'_F1_</i><br><i>RACE</i> | 5'-TTGAATGAAGCGAGTTTGTTTTT-3'  |                                 |
| <i>PsKNOX8_3'_F2_</i><br><i>RACE</i> | 5'-CAAATGCTCCTTCGTAAATATGG-3'  |                                 |
| <i>PsKNOX8_3'_F3_</i><br><i>RACE</i> | 5'-GAGAAAATGCAGCTATCAGAAACA-3' |                                 |
| <i>PsKNOX8_5'_R1_</i><br><i>RACE</i> |                                | 5'-CCATATTTACGAAGGAGCATTG-3'    |
| <i>PsKNOX8_5'_R2_</i><br><i>RACE</i> |                                | 5'-TTCAACTGCTTCAACCTTCCACA-3'   |
| <i>PsKNOX8_5'_R3_</i><br><i>RACE</i> |                                | 5'-GGAGACTATCGGTGCGGTGG-3'      |
| <i>PSKNOX9_check</i>                 | 5'-ATGCAGTGAGAGAAGAGAAAG-3'    | 5'-GATAACATGAAATGAAGAAG-3'      |
| <i>PSKNOX10_check</i>                | 5'-CGAATCAAATTCGCAGTAGA-3'     | 5'-ATATTAATAATTCTTTCTTTCATCA-3' |

**Table S2**

List of primers for qRT-PCR.

| <b>Gene</b>        | <b>Gene ID/<br/>GenBank<br/>accessions<br/>numbers</b>                                                                                                   | <b>Forward primer</b>                | <b>Reverse primer</b>          |
|--------------------|----------------------------------------------------------------------------------------------------------------------------------------------------------|--------------------------------------|--------------------------------|
| <i>Ubi</i>         | Medtr4g091580<br>( <i>M. truncatula</i><br><i>Polyubiquitin 3</i> )<br><br>L81140.1<br>( <i>P. sativum</i><br><i>polyubiquitin 2</i><br>( <i>PUB2</i> )) | 5'- ATGCAGATYTTTGTGAAGAC -3'         | 5'- ACCACCACGRAGACGGAG -3'     |
| <i>MtACTIN11</i> * | Medtr7g026230                                                                                                                                            | 5'-ACGAGCGTTTCAGATG-3'               | 5'-ACCTCCGATCCAGACA-3'         |
| <i>MtKNOX1</i> **  | EF128056<br><br>Medtr2g024390                                                                                                                            | 5'-ATTCATTCAATGGAGGGTAGTT-3'         | 5'-TTTTGAAAGCATGATAGAAGAGGT-3' |
| <i>MtKNOX2</i> **  | EF128057<br><br>Medtr1g017080                                                                                                                            | 5'-GAAGCGTTGACACTGGCACATC-3'         | 5'-TGGAAAATAGAAGCAACAGACACT-3' |
| <i>MtKNOX3</i> **  | EF128058<br><br>Medtr1g012960                                                                                                                            | 5'-TGCACCAAACCTCCCCTAAGAT-3'         | 5'- TTCCTAAAACAAAAAGACTAA-3'   |
| <i>MtKNOX4</i> **  | EF128059<br><br>Medtr5g011070                                                                                                                            | 5'-<br>AGTGTACTGTAGACCCTCCAATG-3'    | 5'-ACCACACCTAATAATAACAACAGA-3' |
| <i>MtKNOX5</i> **  | EF128060<br><br>Medtr3g106400                                                                                                                            | 5'-<br>GGTCCCAATCCTCCGGTCAATGG-3'    | 5'-TCGTTATCAAGCATGCCCT-3'      |
| <i>MtKNOX6</i> **  | EF128061<br><br>Medtr5g085860                                                                                                                            | 5'- CATGTGCAAGCCATTCCTATG-3'         | 5'- GAAAAATCAACCGTTATGCCCA-3'  |
| <i>MtKNOX7</i>     | XM_003613135<br>Medtr5g033720                                                                                                                            | 5'-AACTGCTTCTGATGATGGTGGTG-3'        | 5'-GGGTTTGTCTTGCTTCTTTTGGGA-3' |
| <i>MtKNOX8</i>     | XM_003591173<br>Medtr1g084060                                                                                                                            | 5'-CGCAACTCACCTCTTTATCCA-3'          | 5'-GCTTTCACGCCCTATTTCTTCA-3'   |
| <i>MtKNOX9</i>     | Medtr4g116545-<br>00360952                                                                                                                               | 5'-<br>TTATGTTCTTTTGGCTGTGTGCCTTC-3' | 5'-CTCTCTGCCTGCTCGTCTTCA-3'    |
| <i>MtKNOX10</i>    | Medtr2g461240                                                                                                                                            | 5'-<br>TTGCTAATGCTAATGGTGTGTGG-3'    | 5'-CTCTGCTTGGTCATCTTCATCGT-3'  |



|                 |                       |                                        |                                         |
|-----------------|-----------------------|----------------------------------------|-----------------------------------------|
| <i>PsActin</i>  | X67666.1              | 5'-<br>CTCAGCACCTTCCAGCAGATGTG-<br>3'  | 5'-<br>CTTCTTATCCATGGCAACATAGTTC-<br>3' |
| <i>PsKNOX1</i>  | AF080104.2            | 5'-<br>TTACTTGAATGGTGGAGCAGACA- 3'     | 5'-ATGGGAAATGAATTGGTGAGAAC-3'           |
| <i>PsKNOX2</i>  | AF080105.1            | 5'-<br>ATCAACATCATCATCAACAAC-<br>3'    | 5'-GTCTAGTTCTGGATCTTTTGAAGA-3'          |
| <i>PsKNOX3</i>  | KP296686/<br>KP296687 | 5'- ATTCCGATCCCAACCAACTCC-3'           | 5'-ACTTACTCCTCCGTCGCCTTTCAA-3'          |
| <i>PsKNOX4</i>  | KP296688              | 5'-CAACTCAAGGCGGAGATAGCAA-<br>3'       | 5'-ATATCACGGCAAGCCATAACA-3'             |
| <i>PsKNOX5</i>  | KP296689/<br>KP296690 | 5'-ACCTCCGAACCTCACCCATCCT-3'           | 5'-TGCGCCATTATTTCCCCTTTGTAT-3'          |
| <i>PsKNOX6</i>  | partial CDS           | 5'-ATGGCTCATCCTCTCTTTCC-3'             | 5'-CTCCATGAACTGATCCAAAC-3'              |
| <i>PsKNOX8</i>  | KT363851              | 5'-TTGAATGAAGCGAGTTTGTTTTT-<br>3'      | 5'-CCATATTTACGAAGGAGCATTTG-3'           |
| <i>PsKNOX9</i>  | KP296691              | 5'-CACTTGGAAACCGGAGAGGAGAG-<br>3'      | 5'-GAGTTGCGATTCGGAGACACG-3'             |
| <i>PsKNOX10</i> | KP296692              | 5'-<br>ACATGCAAAGGCTACTACCGTTCA-<br>3' | 5'-AATTCCTCTTCCGTCGTCGTTTTG-3'          |
| <i>MtIPT1</i>   | Medtr1g110590         | 5'-TCGCCACCCTCTTCCCTTAC-3'             | 5'-CCGACAACACAGGAAACGAAA-3'             |
| <i>MtIPT3</i>   | Medtr1g072540         | 5'-<br>TCCTCCAAATCACCAAACATAAAA-<br>3' | 5'-CGCCCATCACCAACTACTACA-3'             |
| <i>MtIPT4</i>   | Medtr2g022140         | 5'-GCCACCGAAACGCACCTTA-3'              | 5'-ATTCCCTGTCCCACCACCTC-3'              |
| <i>PsIPT2</i>   | AB194605.1            | 5'-<br>GGAAAGACCAAATTAGCCATAGAT-<br>3' | 5'-AACCCAAAGAAAACAACACTCATA-<br>3'      |
| <i>PsIPT3</i>   | KP296693              | 5'- AATCACGGGCCACGGACATC-3'            | 5'- CATCGACCCAAAGACAACAGAAG-3'          |
| <i>PsIPT4</i>   | KP296694              | 5'-<br>ATCCCCTTTCATCAACGCAACAA-3'      | 5'- GTCCACCATTCCCGAGTCAAACAT-<br>3'     |
| <i>MtLOG1</i>   | Medtr7g101290.1       | 5'-GGGGATATGGA ACTCTGGAGGA-<br>3'      | 5'-TGTCATCGCAACAACGGAAA-3'              |
| <i>MtLOG2</i>   | Medtr1g064260.1       | 5'-TAACTGGTGAAACGGTGGGAGA-<br>3'       | 5'-CCA ACTCTTTTGATGTAGGTGCTGA-<br>3'    |

|                          |                          |                                         |                                     |
|--------------------------|--------------------------|-----------------------------------------|-------------------------------------|
| <i>MtLOG3</i>            | Medtr4g058740.1          | 5'-ATTGTTTTGATGGGGTTGGTTT-3'            | 5'-AGCTCTTTTGTGATGGTGCAGA-3'        |
| <i>MtLOG4</i>            | Medtr3g113710.1          | 5'-<br>ACGCATCTGTGTTTATTGTGGTAGC-<br>3' | 5'-GTTCTTCGAGGGTGCCATATCC-3'        |
| <i>MtLOG5</i>            | Medtr1g105240.1          | 5'-TCAACGCCTCTTTTCTCCATCA-3'            | 5'-CAGACCCACACTACCACCTCCA-3'        |
| <i>MtLOG6</i>            | Medtr1g015830.1          | 5'-GGTGGAAAGTGTGGATTGATGG-<br>3'        | 5'-AAGTTCTTTGGCTGATGAAGCTGA-3'      |
| <i>LOG_Medtr3g041540</i> | <i>LOG_Medtr3g041540</i> | 5'-GGTTTCCATTTTTGCGTTGAGG-3'            | 5'-TGACCTTTTCACAGTCCATTTCGT-3'      |
| <i>PsLOG1</i>            | KP296697                 | 5'-<br>TGACAAGCCGGTGGGATTAGTAG-3'       | 5'-ATTATGTGACGAGCATTGGACTG-3'       |
| <i>PsLOG2</i>            | KP296698                 | 5'-<br>ACAAGCTGTTCATGATGGTGGTAGA<br>-3' | 5'-AGCTTTGTCAATGAATGACAGTAAC-<br>3' |
| <i>MtRR4*</i>            | Medtr5g036480            | 5'-ATGCTTTTGTTCGGGTTTA-3'               | 5'-CTGCACCTTCCTCCAAACAT-3'          |
| <i>PsRR4</i>             | KP296699                 | 5'-<br>GGAGGAAGGTGCAGAGGATTTTA-3'       | 5'-GGGCGAAGAAGACAAAGGAGATG-<br>3'   |
| <i>PsRR8</i>             | KP296702,<br>KP296703    | 5'-TTGAGGAAGGAGCGGAGGAT-3'              | 5'-AATGTGGCGGATAGAGATGGGC- 3'       |

\* Sequence of primers for *MtActin11* and for *MtRR4* were taken from Gonzalez-Rizzo et al., 2006

\*\*Sequence of primers for *MtKNOX1-6* were taken from Giacomo et al., 2008
